# Supplementary material for: Landsat, MODIS, and VIIRS snow cover mapping algorithm performance as validated by airborne lidar datasets
Source: Copernicus journal article supplement (doi:10.5194/tc-2022-159), 2022-08-15
Supplement: Supplementary file [file tc-2022-159-AC1-supplement.pdf]

## Authors response to RC-1

The reviewer's comments are in Cambria font.

The authors' responses are in blue Calibri font and are indented

The paper provides a detailed overview of the quality of standard snow products.

While the used analysis methods are not new, the absolutely new approach lies in the fact that it is the only work, I know so far, which comprehensively evaluated NASA snow cover products with precision lidar data. It gives an excellent overview on the quality of the products. This work is very useful for all who are working in the field of snow remote sensing.

The minor corrections that have to be done are only technical ones:

- Line 207: wrong figure given. It is fig. 2 not fig. 1

Thank you for catching this error. Fixed.

- Figures 4 and 5: Labelling of the x-axes; it would be more convenient, if each of the graphs would show a labelling of the x-axes plus name of the axe (% of snow cover, % of canopy cover)

An x-axis label has been added to figure 4 and 5. Because the x-axis is the same for all rows in each column in each figure, we have only placed a single x-axis that is labeled at the bottom of each column.
