# Supplementary material for: Landsat, MODIS, and VIIRS snow cover mapping algorithm performance as validated by airborne lidar datasets
Source: Copernicus journal article supplement (doi:10.5194/tc-2022-159), 2022-08-15
Supplement: Supplementary file [file tc-2022-159-AC3-supplement.pdf]

## Authors response to RC-2

The reviewer's comments are in Cambria font.

The authors' responses are in blue Calibri font and are indented

### General comment

Overall this is a well-constructed paper that offers a new development in the assessment of fSCA products delivered by several spaceborne sensors (MODIS, VIIRS, Landsat) against snow cover as determined from lidar-derived snow depth maps provided by the Airborne Snow Observatory (ASO).

I found the discussion particularly well laid out and containing many useful points that will serve the community well, particularly as we consider more MODIS – VIIRS data continuity for snow cover mapping.

I recommend publication once the specific comments below have been addressed. I have also noted technical/editorial points below that should be addressed.

Thank you for your thorough and thoughtful review of the manuscript.

### Specific comments

The authors frequently refer to MODIS as having 463 m resolution, which is a fair point to make, but I think this should be better supported by relevant references/explanation to ensure that readers understand the reason for the distinction. This is particularly the case when most documentation (including that cited by the authors) refers to 500 m resolution, and where most readers would be interacting primarily with MODIS products that are resampled to a 500 m grid.

Clarification has been added to line 62 of the paper. The sentence now reads:

*“At a 463 m spatial resolution (i.e., the sinusoidal tile product grid cell size for Moderate-resolution Imaging Spectroradiometer (MODIS) data with Ground Sample Distances of 500m at nadir) (Campagnolo and Montaña 2014)”*

This is an important technical detail for the appropriate use and validation MODIS data. All of the MODIS data docs (e.g. Users Guides) state 250m/500m/1km as “grid cell” size, but those are Ground Sample Distances (GSD) at nadir, not the grid cell sizes.

MODIS uses an authalic sphere (no flattening) of  $r=6371007.181$  m radius & there are  $h=36$  horizontal tiles covering all longitudes. Thus, each tile's width is  $w=2*\pi*r/h = 1,111,950.5$  m. For the three GSDs mentioned above, the grids are 4800, 2400, and 1200 pixels wide. Thus, the cell size for each is 231.7, 463.3, & 926.6 m.

Section II in the following paper confirms the pixel grid size is 463 and not the same as the 500m GSD.

M. L. Campagnolo and E. L. Montaña, "Estimation of Effective Resolution for Daily MODIS Gridded Surface Reflectance Products," in *IEEE Transactions on Geoscience and Remote Sensing*, vol. 52, no. 9, pp. 5622-5632, Sept. 2014, doi: 10.1109/TGRS.2013.2291496.

A central challenge to this approach is the conversion of snow depth (in this case from the ASO maps) to snow cover, in order to compare against fSCA products. Here, the authors used an 8 cm threshold to convert snow depth to snow cover in the ASO data, based on reported MAE of 8 cm for ASO snow depth products (Painter et al., 2016). I found the justification for this somewhat lacking, noting that Painter et al. state that (as of 2016), ASO data had not been subject to a full accuracy assessment in forested areas and steep terrain, and the 8 cm MAE is determined with respect to manual snow depth measurements – a comparison which can itself be problematic. Given the role of the ASO snow depth products as the reference dataset underpinning the analysis presented in this manuscript, I think there is scope for a more robust approach to converting ASO snow depth to snow cover. This could include, for example, analyzing residuals in ASO products for snow-free areas, and comparing ASO snow depth maps with optical imagery acquired contemporaneously (if/when available). It would be interesting to consider more fully the quality of ASO snow depth maps in steeper terrain where, for example, even relatively small co-registration errors may result in large errors (both positive and negative) in snow depth estimation. Furthermore, discarding snow depths <8 cm seems a bit blunt given that depths of much less than that can certainly contribute to a snow signal detectable by the fSCA mapping techniques employed in this paper. I was hoping that these issues may have been considered in the discussion (e.g. sec. 4.6).

We thank the reviewer for bringing this issue up. Given the published MAE of 8 cm in snow depth (Painter et al. 2016), we find that snow cover cannot be reliably classified by ASO below this value. This 8 cm MAE is higher than values more recently reported by ASO Inc, starting in the water year 2021, which are 2-3 cm, validated with in situ measurements. However, the 8 cm value is lower than the 10 cm MAE reported by Currier et al. (2019) who compare gridded ASO snow depth with gridded snow depth maps from a terrestrial laser scanner. To our knowledge, these validations have taken place in relatively flat areas. We agree with the reviewer that validation in steeper terrain is needed, but is beyond the scope of this study.

For this work, we relied on two prior peer reviewed papers where we used the same ASO validation methodology and validated alongside co-located Worldview 2/3 datasets. Because we had already compared subsets of this ASO dataset to WV2/3 data, we did not duplicate that analysis in this paper. Those papers are cited in the submission:

Bair, E. H., Rittger, K., Davis, R. E., Painter, T. H., and Dozier, J.: Validating reconstruction of snow water equivalent in California's Sierra Nevada using measurements from the NASA Airborne Snow Observatory, 850 *Water Resour Res*, 52, 8437-8460, 10.1002/2016wr018704, 2016.

Bair, E. H., Stilling, T., and Dozier, J.: Snow Property Inversion From Remote Sensing (SPIReS): A Generalized Multispectral Unmixing Approach With Examples From MODIS and Landsat 8 OLI, *Ieee T Geosci Remote*, 59, 7270-7284, 10.1109/Tgrs.2020.3040328, 2021a.

Our methodology is based on prior validation, from the above studies, with the ASO datasets. We acknowledge that the validation data are imperfect (original submission line 321-328, line 687-697, Line 749-752). For steep, rugged, terrain, past validation analysis of the difference

between 0.5m binary snow maps and ASO yielded an overall accuracy of 0.9998, F-stat of 0.991, recall of 0.992 and precision of 0.990 (Bair et al 2016, section 4.4.2 and table 4).

Only 1.9% of ASO snow depths has values less than 8 cm. Further, coarsening our validation datasets to 120 m and 2 km reduces the influence of spurious misclassifications of thin snow as false negatives. Using a different threshold would not significantly change the results of our analysis.

## Technical/editorial comments

Line 27: "...spectral mixture..." should be spectral unmixing?

Changed.

Line 42: "...billions of people." This reads a little imprecisely/colloquially, and repetitive with respect to Line 2.

Changed - the second use of billions of people was deleted.

Line 61: "At a 463 m spatial resolution..." some further explanation/reference here would be useful, as many readers would expect to see 500 m here, as widely documented, and most users are typically interacting with data resampled to a 500 m grid. It is also worth noting that it is possible to map snow from MODIS at finer (e.g., 250 m) resolution.

While two bands are available at 250m, they are not in portions of the electromagnetic spectrum that enable a NDSI calculation, nor are they used in the standard products. While snow can be identified in some situation with these bands, we focused on the standard products and spectral unmixing methods for this paper as these are the best automated globally applicable algorithms that readers are most likely to come across.

Figure 1 (caption): "Pixels are 463 m." This statement is a little ambiguous, perhaps make explicit reference to the spatial resolution?

Spatial resolution has been added to the sentence.

Line 110: "MODiMlab" should be MODImLab?

Thanks for catching this error, changed.

Figure 3: I think this figure would benefit from some additional context, especially for readers outside of North America. Perhaps major basin outlines and/or elevation contours (at an appropriate interval for scale), for example, could be added?

Thank you for the recommendation. Readers outside of North America will be unfamiliar with the specific basins used in the study. The goal of the figure is not to highlight specific basins but instead to place the study locations in the geographic context of the western United States and highlight the diversity of snow classes within the study area. We have decided to leave Figure 3 unchanged.

Table 2: Reference Hall et al., (2019) missing from reference list? Presumably the document referred to is: MODIS Snow Products Collection 6.1 User Guide? Which would be Riggs et al. (2019). In any case, only refers to the spatial resolution being 500 m.

Please see our response above RE 463 m vs 500 m. References have been updated in the manuscript.

Line 207: “...(see Fig. 4).” Should be figure 2?

Thanks for catching this error, changed.

Line 304: what changes beyond the basin boundaries to make data unreliable?

The second paragraph in section 4.2.1 highlights the main issue- that the value of 0 in the 3m snow depth dataset represents both a NaN value and a 0 cm snow depth value in many files. Extensive manual examination of the ASO 3m snow depths alongside the final ASO product, the 50m SWE product, confirmed that this data representation issue is not present in the 50m SWE datasets and that by using the method described in line 306 – using the 50m SWE dataset to select valid 3m snow depth (and snow free) areas we were able to use the NaN values in the 50m SWE dataset to accurately map NaNs in the 3m snow depth dataset. Because the 50m SWE datasets are constrained to the basin boundaries, we did not have a reliable way to determine the difference between NaN and 0 snow depth outside of the basin boundaries.

Line 308 – 314: I’m not sure that the case is well made here for the 8 cm threshold – see previous comment.

Please see our response to the previous response on this topic as well. We have added additional text to clarify the reasoning behind the choice and past peer reviewed validation efforts using this dataset and this threshold. Some additional information on the characteristics of the data that is excluded is presented as well.

Line 314 – 315: How was the resolution coarsened? The choice of technique will impact results, so please be specific.

The following text has been added to these lines to clarify the coarsening procedure: *“The 3m binary snow cover maps were coarsened via gaussian pyramid reduction to reach the significantly coarser validation resolutions and then bilinear interpolation was used to reproject the coarsened data to each snow products native projection.”*

Line 324 – 328: Mirroring my earlier comment, given the importance of ASO data to the rest of your analysis, I think you could go further in evaluating its quality and considering limitations here.

The validation of ASO data is beyond the scope of this paper and has already been performed as noted in earlier comments. Limitations are discussed at the end of section 4.2.1. See Painter 2016, Currier 2019, 2021-onwards ASO reports for evaluations.

Line 384: It could be useful for readers to indicate the range of typical values you see here for F statistic?

The range for F values has been added to the paper.

Line 469: “All snow cover fractions...” is all the right word here? Implies all possible outcomes occurred/observed, perhaps indicate the range of observed fSCA?

Yes this is correct, all possible snow cover fractions were observed in all snow cover products.

Line 484: “...constricted...” would constrained or restricted be better here?

Constricted has been replaced with “constrained”.

Figure 4: x axes should be labelled on plots.

Labels have been added to the x-axes in the figures. X-axes are the same for all the graphs in each column, same for y axis for each graph in each row. This had been clarified in the caption for figure 4 and figure 5 which both use the same approach.

Line 545: Collection of ASO data suggests good viewing conditions, but is there no possibility of cloud impacts – seems like a question worth asking if maritime regions see highest RMSE?

Validation was only performed on cloud free days for Landsat scenes, and ASO is flown on clear days and underneath most clouds. Any day where clouds were present was removed from the validation dataset as described in line 168.

Line 548: “...slightly edging out...” perhaps outperforming would be better phrasing here?

Changed.

Line 732 – 734: Is it realistic that there might be no issues with the reference data contributing here?

Yes, you are correct that there could be issues with the reference data. ASO may not map all rock outcrops correctly in alpine regions and may instead consider those locations to be fully snow covered. So, ASO might be overestimating snow cover at high fSCA values, contributing to the negative bias we measured. But, based on our analysis of the spectral unmixing solutions for these high snow cover alpine pixels and past comparison of ASO to Worldview 2/3 snow maps in Bair et al 2016, we are confident that the reasons posited at the beginning of section 6.4 are the dominant factors in the negative biases found for these high snow cover pixels. These are A) the combination of positive bias being impossible to achieve (cannot have more than 100% snow cover) and B) the “one-to-many” issue

with spectral unmixing where solutions with fSCA close to 100% generates plausible spectral unmixing solutions (e.g. fSCA of >95% but  $\sim$ 100%). These are reasonable issues that transcend specific validation methodologies and are applicable to any spectral unmixing approaches for any land surfaces. We think it is important for the reader to be aware of and focus on these points over ASO data details.

## References

- Painter, T.H., Berisford, D.F., Boardman, J.W., Bormann, K.J., Deems, J.S., Gehrke, F., Hedrick, A., Joyce, M., Laidlaw, R., Marks, D. and Mattmann, C., 2016. The Airborne Snow Observatory: Fusion of scanning lidar, imaging spectrometer, and physically-based modeling for mapping snow water equivalent and snow albedo. *Remote Sensing of Environment*, 184, pp.139-152.
- Riggs, G.A., Hall, D.K. and Román, M.O., 2015. MODIS snow products collection 6 user guide. National Snow and Ice Data Center: Boulder, CO, USA, 66.
